# Supplementary figures and images for: A simulation study of the influence of the traveling wave patterns on ion mobility separations in structures for lossless ion manipulations
Source: Royal Society of Chemistry journal article supplement (doi:10.1039/c9an01509d), 2019-10-30

## Supplementary Figures

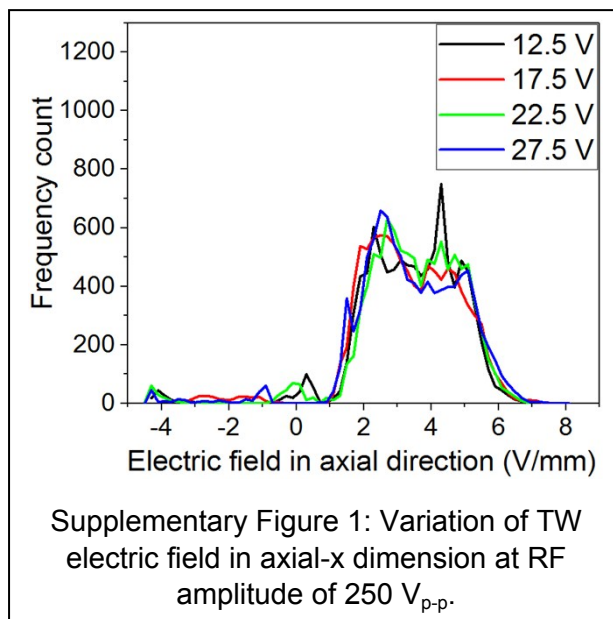

Supplement: c9an01509d1.pdf [file c9an01509d1.pdf]
